# Supplementary material for: Distinguishing the impacts of natural and anthropogenic aerosols on global gross primary productivity through diffuse fertilization effect
Source: Copernicus journal article supplement (doi:10.5194/acp-22-693-2022), 2022-01-17
Supplement: Supplementary file 1 [file acp-22-693-2022-supplement.pdf]

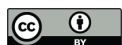

*Supplement of*

## **Distinguishing the impacts of natural and anthropogenic aerosols on global gross primary productivity through diffuse fertilization effect**

**Hao Zhou et al.**

*Correspondence to:* Xu Yue (yuexu@nuist.edu.cn)

The copyright of individual parts of the supplement might differ from the article licence.

**Table S1** Information of CEDS inventory

| Source sector              | Emission species                                                                                                                     | Date sources <sup>a</sup>                                                                                                                                                                                               |
|----------------------------|--------------------------------------------------------------------------------------------------------------------------------------|-------------------------------------------------------------------------------------------------------------------------------------------------------------------------------------------------------------------------|
| Fuel combustion            | NO <sub>x</sub> , NMVOC <sub>s</sub> , CO,<br>CH <sub>4</sub><br>BC, OC<br>SO <sub>2</sub><br><br>NH <sub>3</sub><br>CO <sub>2</sub> | GAINS energy use and emissions<br><br>SPEW energy use and emissions<br>GAINS sulfur content and ash retention (Europe), and local emission data<br>US NEI energy use and emissions<br>CDIAC and additional data sources |
| Fugitive petroleum and gas | ALL                                                                                                                                  | EDGAR emissions and ECLIPSE V5a                                                                                                                                                                                         |
| Cement                     | CO <sub>2</sub>                                                                                                                      | CDIAC                                                                                                                                                                                                                   |
| Agriculture                | CH <sub>4</sub><br>Other                                                                                                             | FAOSTAT and EDGAR<br>EDGAR                                                                                                                                                                                              |
| Waste combustion           | ALL                                                                                                                                  | Estimation with methods from references                                                                                                                                                                                 |
| Waste water treatment      | NH <sub>3</sub>                                                                                                                      | CEDS estimate of NH <sub>3</sub> from human waste                                                                                                                                                                       |
| Other non-combustion       | SO <sub>2</sub><br>ALL                                                                                                               | EDGAR and other data sources<br>EDGAR emissions                                                                                                                                                                         |

<sup>a</sup> More detailed information can be found at Hoesly *et al.* (2018)

**Table S2** Summary of simulations for aerosol diffuse fertilization effects

| Simulations    | Models    | Input                       | Aerosol                          | Cloud | Output                                   |
|----------------|-----------|-----------------------------|----------------------------------|-------|------------------------------------------|
| GC_ALL         | GEOS-Chem | All emissions               | All aerosols                     | Obs.  | Monthly 3-D aerosol concentrations       |
| GC_NAT         |           | All without anth. emissions | Natural aerosols                 |       |                                          |
| CRM_ALL_CLD    | CRM       | Aerosols from GC_ALL        | All aerosols                     | Obs.  | Hourly direct and diffuse PAR at surface |
| CRM_NAT_CLD    |           | Aerosols from GC_NAT        | Natural aerosols                 |       |                                          |
| CRM_NO_CLD     |           | No aerosol input            | NO aerosols                      |       |                                          |
| CRM_ALL_BCCLD  |           | BC from GC_ALL              | BC (natural+ anth.)              |       |                                          |
| CRM_NAT_BCCLD  |           | BC from GC_NAT              | BC (natural)                     |       |                                          |
| CRM_ALL_OCCLD  |           | OC from GC_ALL              | OC (natural+ anth.)              |       |                                          |
| CRM_NAT_OCCLD  |           | OC from GC_NAT              | OC (natural)                     |       |                                          |
| CRM_ALL_SNCLD  |           | Sulfate/Nitrate from GC_ALL | Sulfate/Nitrate (natural+ anth.) |       |                                          |
| CRM_NAT_SNCLD  |           | Sulfate/Nitrate from GC_NAT | Sulfate/Nitrate (natural)        |       |                                          |
| CRM_NAT_SSCLD  |           | Sea salts from GC_NAT       | Sea salt (natural)               |       |                                          |
| CRM_NAT_DSCLD  |           | Dust from GC_NAT            | Dust (natural)                   |       |                                          |
| CRM_ALL_CLR    |           | Aerosols from GC_ALL        | All aerosols                     | None  |                                          |
| CRM_NAT_CLR    |           | Aerosols from GC_NAT        | Natural aerosols                 |       |                                          |
| CRM_NO_CLR     |           | No aerosol input            | NO aerosols                      |       |                                          |
| CRM_ALL_BCCLR  |           | BC from GC_ALL              | BC (natural+ anth.)              |       |                                          |
| CRM_NAT_BCCLR  |           | BC from GC_NAT              | BC (natural)                     |       |                                          |
| CRM_ALL_OCCLR  |           | OC from GC_ALL              | OC (natural+ anth.)              |       |                                          |
| CRM_NAT_OCCLR  |           | OC from GC_NAT              | OC (natural)                     |       |                                          |
| CRM_ALL_SNCLR  |           | Sulfate/Nitrate from GC_ALL | Sulfate/Nitrate (natural+ anth.) |       |                                          |
| CRM_NAT_SNCLR  |           | Sulfate/Nitrate from GC_NAT | Sulfate/Nitrate (natural)        |       |                                          |
| CRM_NAT_SSCLR  |           | Sea salts from GC_NAT       | Sea salt aerosols (natural)      |       |                                          |
| CRM_NAT_DSCLR  |           | Dust from GC_NAT            | Dust aerosols (natural)          |       |                                          |
| YIBS_ALL_CLD   | YIBs      | PAR from CRM_ALL_CLD        | All aerosols                     | Obs.  | Monthly GPP                              |
| YIBS_NAT_CLD   |           | PAR from CRM_NAT_CLD        | Natural aerosols                 |       |                                          |
| YIBS_NO_CLD    |           | PAR from CRM_NO_CLD         | NO aerosols                      |       |                                          |
| YIBS_ALL_BCCLD |           | PAR from CRM_ALL_BCCLD      | BC (natural+ anth.)              |       |                                          |
| YIBS_NAT_BCCLD |           | PAR from CRM_NAT_BCCLD      | BC (natural)                     |       |                                          |
| YIBS_ALL_OCCLD |           | PAR from CRM_ALL_BCCLD      | OC (natural+ anth.)              |       |                                          |
| YIBS_NAT_OCCLD |           | PAR from CRM_NAT_OCCLD      | OC (natural)                     |       |                                          |
| YIBS_ALL_SNCLD |           | PAR from CRM_ALL_SNCLD      | Sulfate/Nitrate (natural+ anth.) |       |                                          |
| YIBS_NAT_SNCLD |           | PAR from CRM_NAT_SNCLD      | Sulfate/Nitrate (natural)        |       |                                          |
| YIBS_NAT_SSCLD |           | PAR from CRM_NAT_SSCLD      | Sea salt (natural)               |       |                                          |
| YIBS_NAT_DSCLD |           | PAR from CRM_NAT_DSCLD      | Dust (natural)                   |       |                                          |
| YIBS_ALL_CLR   |           | PAR from CRM_ALL_CLR        | All aerosols                     | None  |                                          |
| YIBS_NAT_CLR   |           | PAR from CRM_NAT_CLR        | Natural aerosols                 |       |                                          |
| YIBS_NO_CLR    |           | PAR from CRM_NO_CLR         | NO aerosols                      |       |                                          |
| YIBS_ALL_BCCLR |           | PAR from CRM_ALL_BCCLR      | BC (natural+ anth.)              |       |                                          |
| YIBS_NAT_BCCLR |           | PAR from CRM_NAT_BCCLR      | BC (natural)                     |       |                                          |

|                |  |                        |                                  |  |  |
|----------------|--|------------------------|----------------------------------|--|--|
| YIBS_ALL_OCCLR |  | PAR from CRM_ALL_OCCLR | OC (natural+ anth.)              |  |  |
| YIBS_NAT_OCCLR |  | PAR from CRM_NAT_OCCLR | OC (natural)                     |  |  |
| YIBS_ALL_SNCLR |  | PAR from CRM_ALL_SNCLR | Sulfate/Nitrate (natural+ anth.) |  |  |
| YIBS_NAT_SNCLR |  | PAR from CRM_NAT_SNCLR | Sulfate/Nitrate (natural)        |  |  |
| YIBS_NAT_SSCLR |  | PAR from CRM_NAT_SSCLR | Sea salt aerosols (natural)      |  |  |
| YIBS_NAT_DSCLR |  | PAR from CRM_NAT_DSCLR | Dust aerosols (natural)          |  |  |

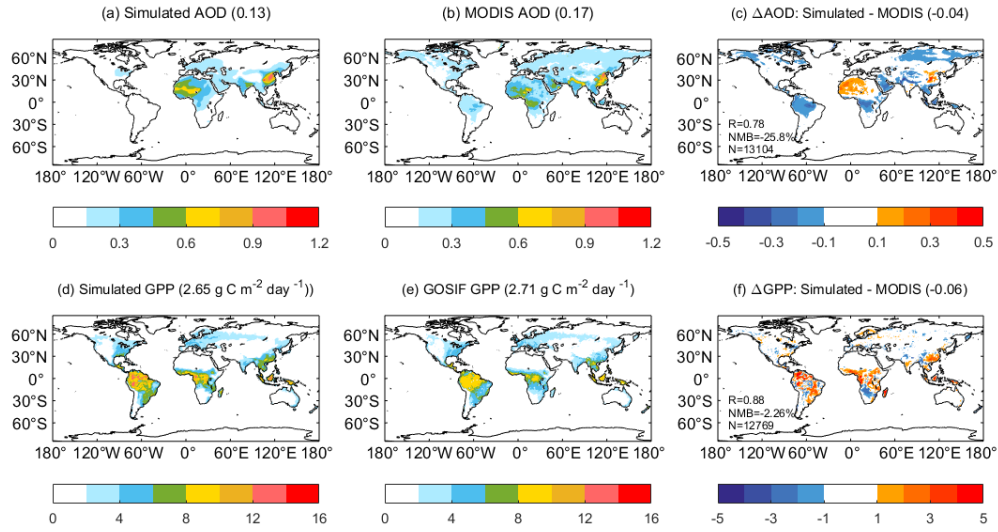

**Figure S1** Evaluations of simulated AOD by GEOS-Chem and GPP by YIBs model. Results shown are the annual (a, b) AOD at 550 nm and (d, e) GPP from (a, d) simulations, (b, e) observations and (c, f) their differences during 2001-2014. Simulated AOD is performed with the GEOS-Chem chemical transport model, which is driven with MERRA meteorology and emissions from anthropogenic and natural sources. Observed AOD is retrieved from the Moderate Resolution Imaging Spectroradiometer (MODIS, <https://modis.gsfc.nasa.gov>). Simulated GPP is derived using YIBs vegetation model, which is driven with hourly  $1^\circ \times 1^\circ$  meteorological forcings from MERRA-2 reanalyses. Observed GPP is derived from global OCO-2-based SIF product with linear relationships between SIF and GPP (Li & Xiao, 2019). The R, NMB and N are shown in (c) and (f).

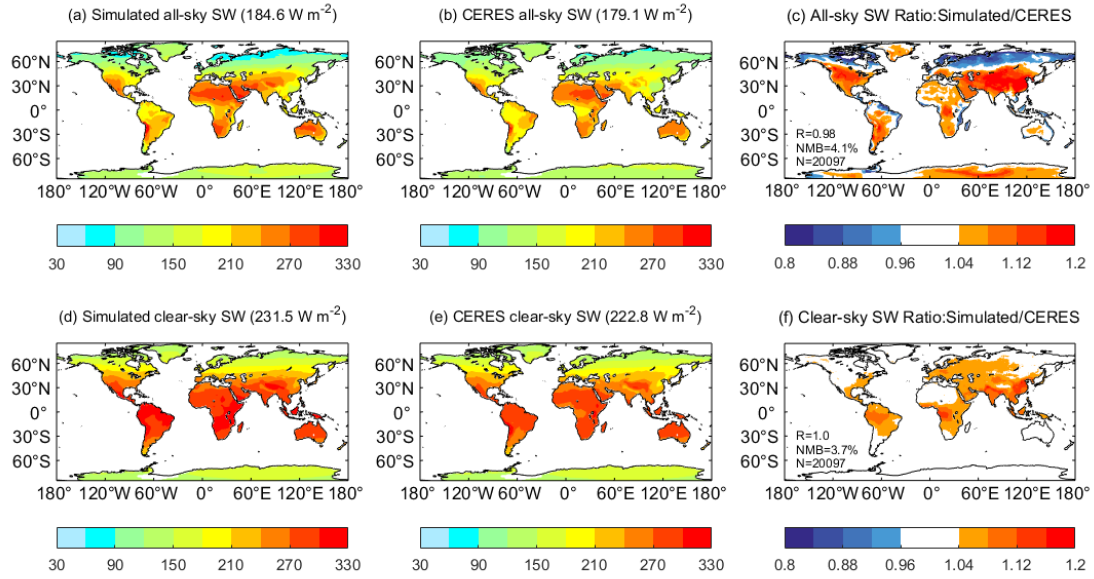

**Figure S2** Evaluations of simulated shortwave radiation (SW) by CRM model. Results shown are the annual (a, b) all-sky and (d, e) clear-sky SW from (a, d) simulations, (b, e) observations and (c, f) their ratios during 2001-2014. Simulations are derived using the Column Radiation Model (CRM), which is driven with hourly  $1^\circ \times 1^\circ$  meteorological forcings from MERRA-2 and cloud profiles from the SYN1deg product of CERES. Observed SW is adopted from the CERES SYN1deg datasets. The R, NMB and N are shown in (c) and (f).

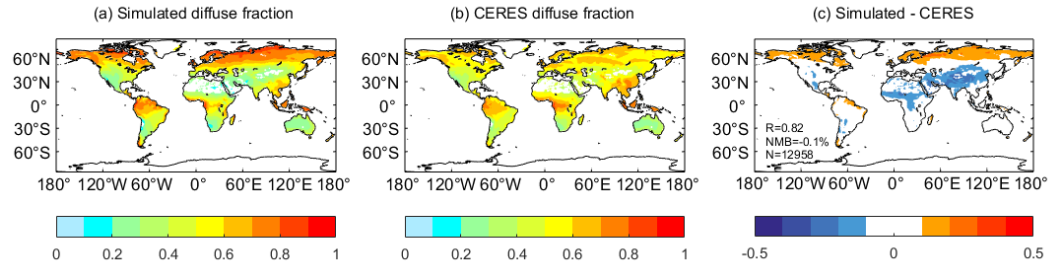

**Figure S3** Evaluations of simulated diffuse fraction (DF) by CRM model. Results shown are the annual DF from (a) simulations, (b) observations and (c) their differences over land vegetated grids during 2001-2014. Simulations are performed using the Column Radiation Model (CRM), which is driven with hourly  $1^\circ \times 1^\circ$  meteorological forcings from MERRA-2 and cloud profiles from the SYN1deg product of CERES. The R, NMB and N are shown in (c).

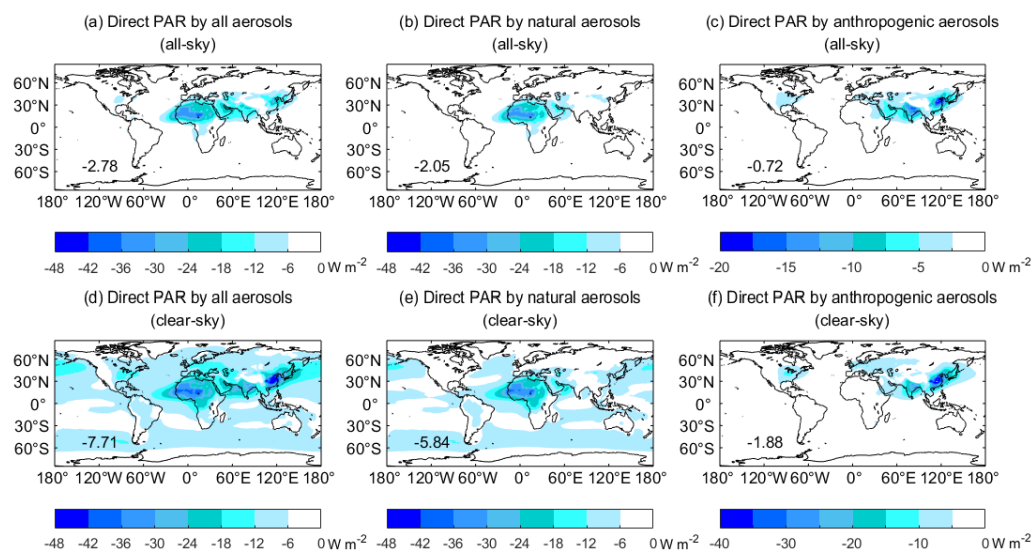

**Figure S4** Global direct PAR changes at surface by all, natural and anthropogenic aerosols at (a, b, c) all-sky and (d, e, f) clear-sky conditions. The units are  $\text{W m}^{-2}$ . The global changes in direct PAR caused by different aerosol sources are shown on corresponding panels. Please notice that the color scales for natural and anthropogenic aerosols are different.



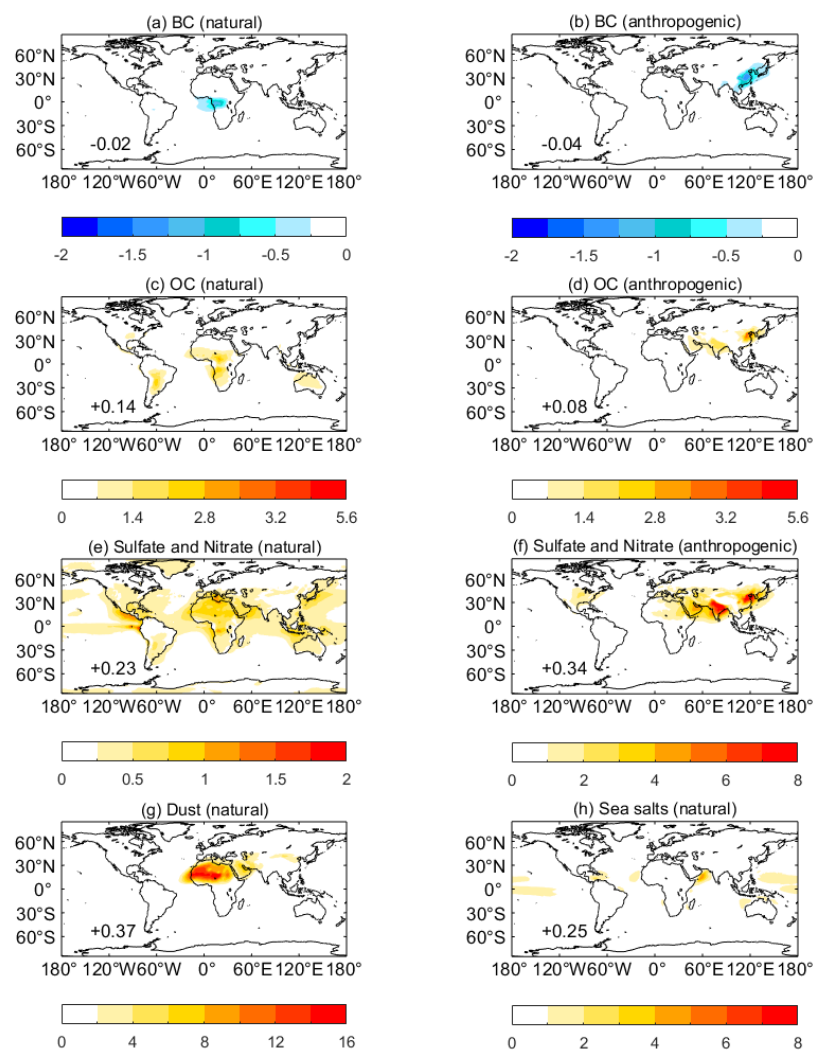

**Figure S5** Global diffuse PAR changes by specific natural and anthropogenic aerosols at all skies. The units are W m<sup>-2</sup>. The global changes in diffuse PAR caused by individual aerosol species are shown on corresponding panels. Please notice that the color scales for different aerosol species are different.

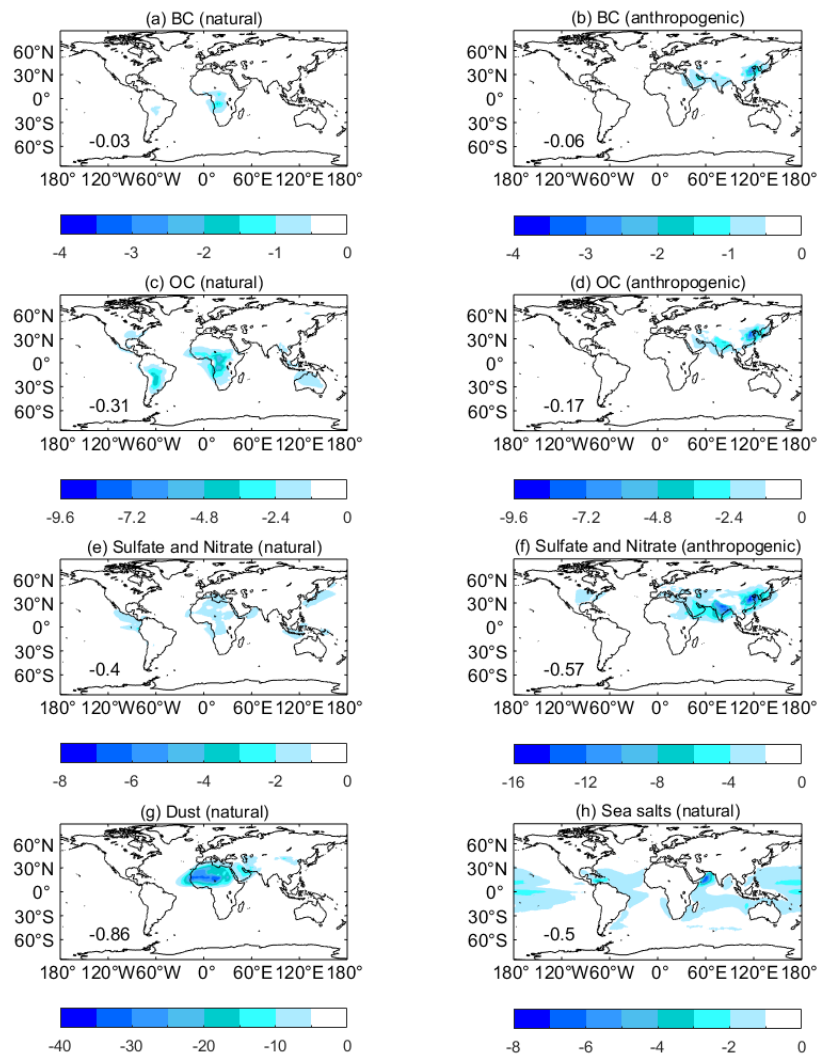

**Figure S6** Global direct PAR changes by specific natural and anthropogenic aerosols at all skies. The units are  $\text{W m}^{-2}$ . The global changes in direct PAR caused by individual aerosol species are shown on corresponding panels. Please notice that the color scales for different aerosol species are different.

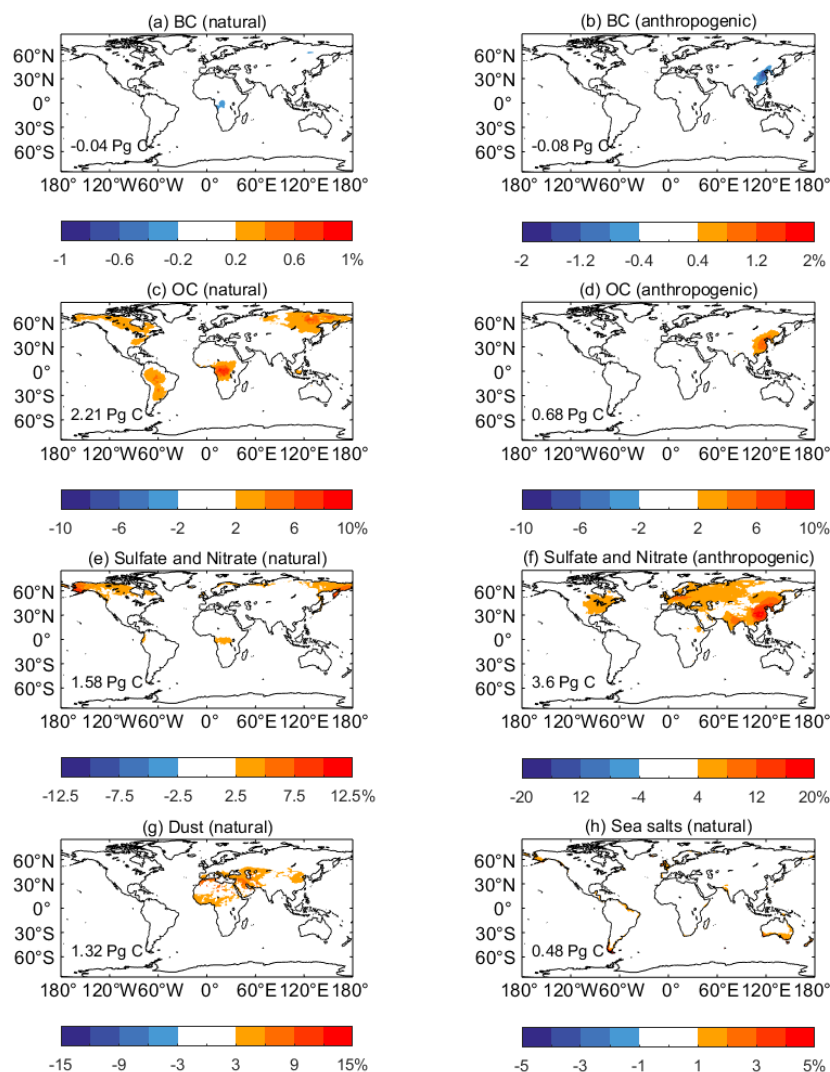

**Figure S7** Percentage changes in GPP by specific natural and anthropogenic aerosols at clear skies. The units are %. The global changes in GPP caused by individual aerosol species are shown on corresponding panels. Please notice that the color scales for different aerosol species are different.

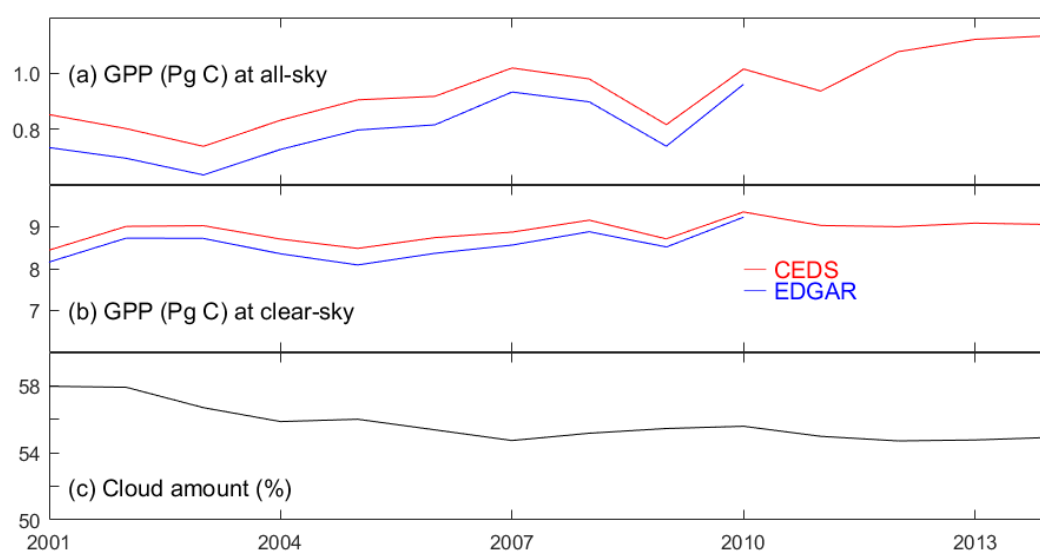

**Figure S8** The interannual variations of global GPP changes caused by aerosol DFE at (a) all skies and (b) clear skies, and (c) the simultaneous changes in cloud amount (%) during 2001-2014. The aerosols are simulated using anthropogenic emissions from CEDS (red) and EDGAR (blue).

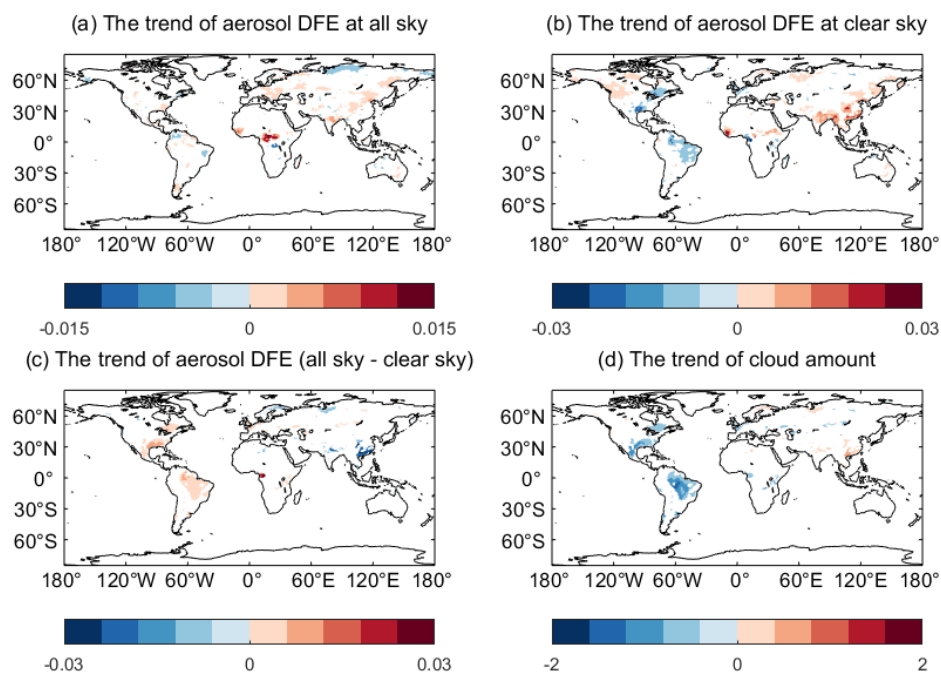

**Figure S9** Trends of aerosol DFE ( $\text{g C m}^{-2} \text{ day}^{-1} \text{ yr}^{-1}$ ) at (a) all skies and (b) clear skies. The difference between (a) and (b) is presented in (c), and the trend of cloud amount ( $\% \text{ yr}^{-1}$ ) is shown in (d). Only the significant trends ( $p < 0.05$ ) are presented.

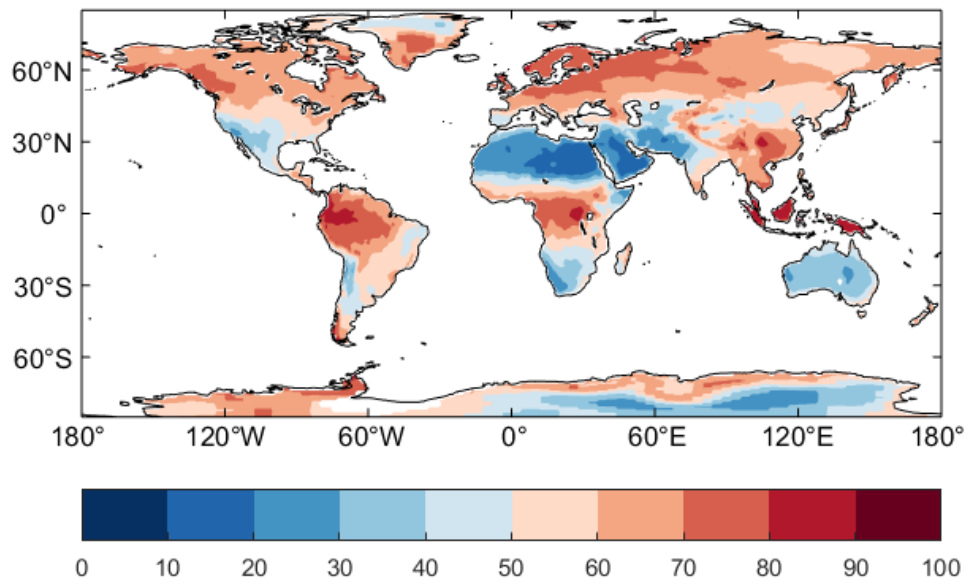

**Figure S10** Spatial distribution of global cloud amount. Results shown are annual average cloud fraction (%) from the SYN1deg product of NASA Clouds and the Earth's Radiant Energy System (CERES) during 2001-2014.

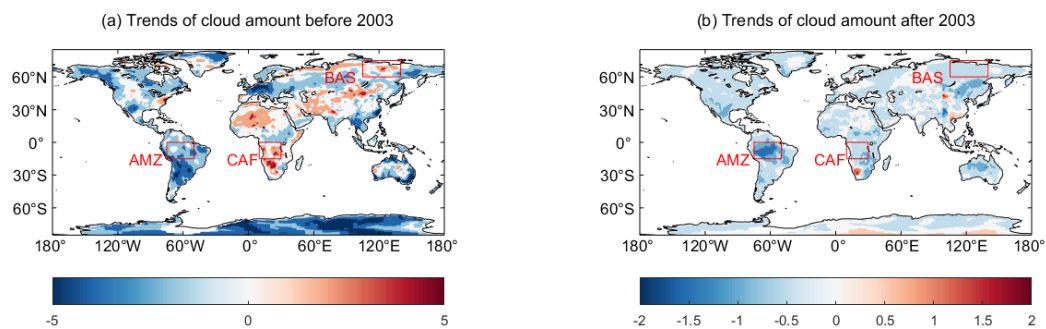

**Figure S11** Trends of cloud amount before 2003 (a) and after 2003 (b). The regions marked in map include Amazon (AMZ), central Africa (CAF) and boreal Asia (BAS). The units  $\% \text{ yr}^{-1}$ .

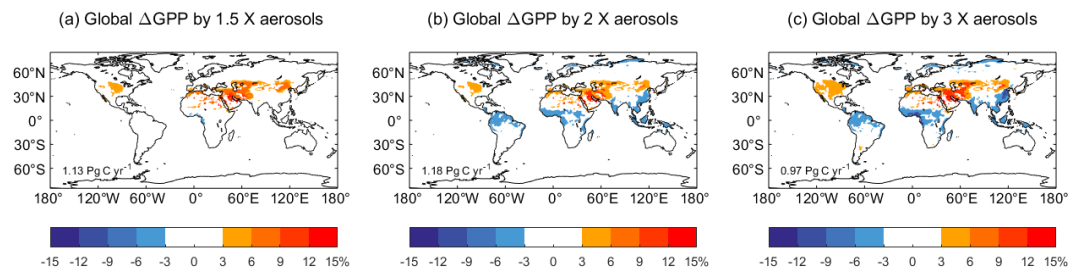

**Figure S12** The same as Figure 3a but with 1.5, 2, and 3 times of aerosol concentrations.



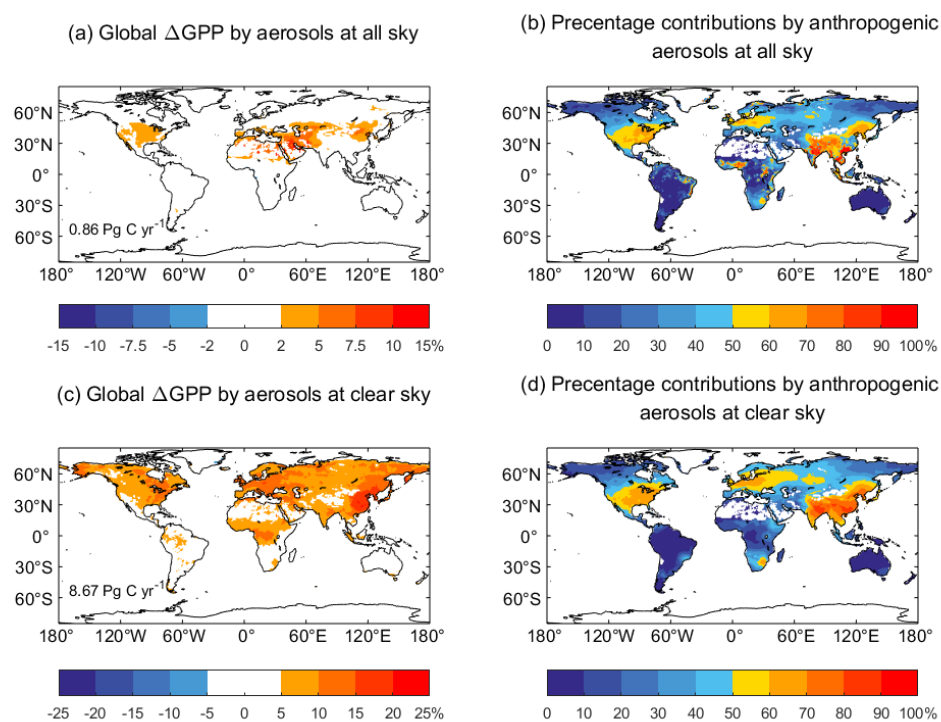

**Figure S13** The same as Figure 3 but with anthropogenic emissions from EDGAR.

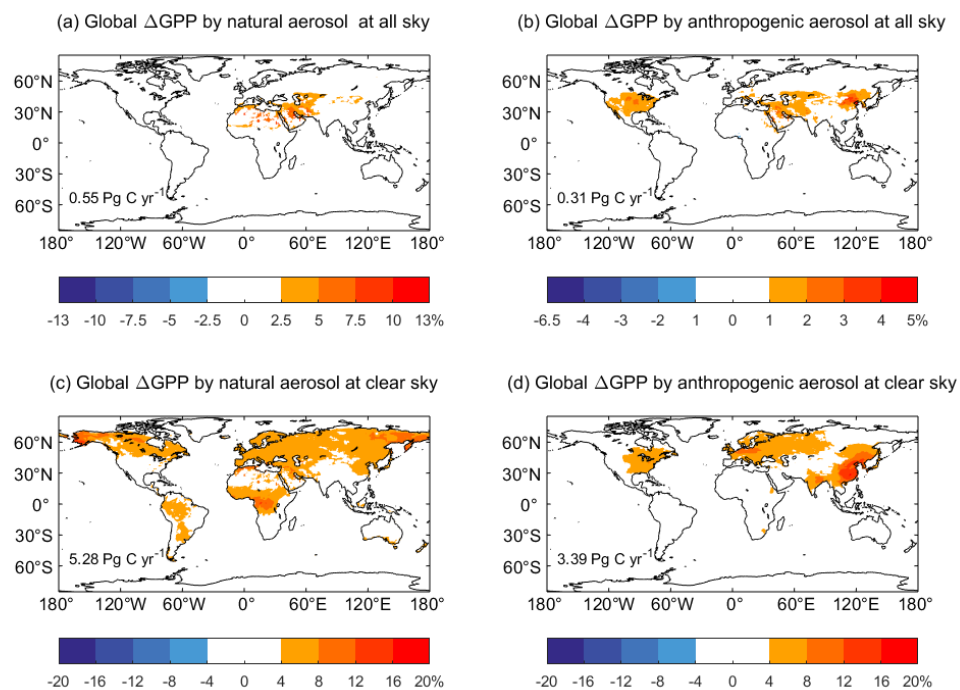

**Figure S14** The same as Figure S6 but with anthropogenic emissions from EDGAR.

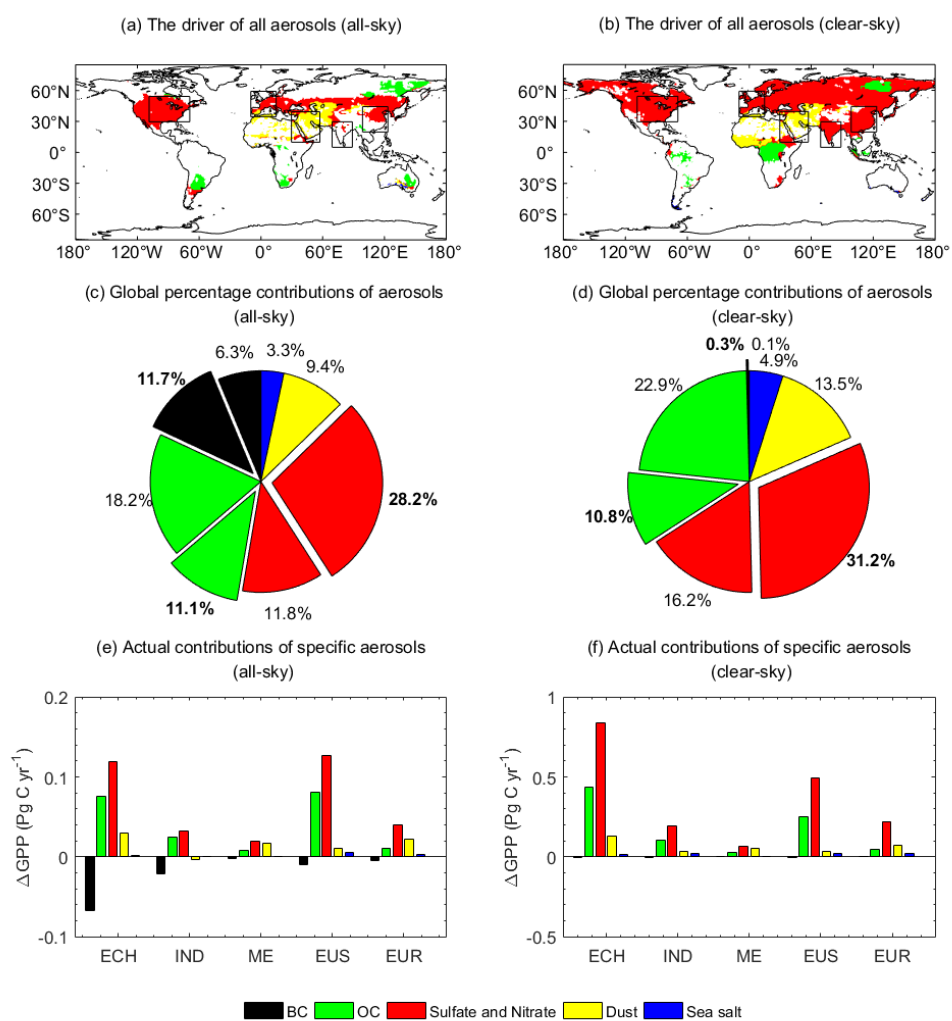

**Figure S15** The same as Figure 6 but with anthropogenic emissions from EDGAR.

#### Reference:

Hoesly RM, Smith SJ, Feng L *et al.* (2018) Historical (1750-2014) anthropogenic emissions of reactive gases and aerosols from the Community Emissions Data System (CEDS). *Geoscientific Model Development*, **11**, 369-408.
